# Supplementary material for: The Multifunctional LigB Adhesin Binds Homeostatic Proteins with Potential Roles in Cutaneous Infection by Pathogenic Leptospira interrogans
Source: PubMed Central journal article supplement (PMC3036719; doi:10.1371/journal.pone.0016879), 2011-02-09
Supplement: pone.0016879.s002.pdf [file pone.0016879.s002.pdf]

**Table S1. Primers for cloning LigB proteins.**

| <i>Forward primers</i> <sup>a</sup> |                                                        |
|-------------------------------------|--------------------------------------------------------|
| 7'                                  | TATAAAC <u>CATATGG</u> GCTGAAATTA AAAATACCAGTGGAAG     |
| 8                                   | TATTTAC <u>CATATG</u> CAATTGATTTCCATTGCCGTA            |
| P-8 <sup>b</sup>                    | CAATTGATTTCCATTGCCGTA                                  |
| 9                                   | ATACTCC <u>CATATG</u> CTTCTTACTTCTATCGAGATAACACCG      |
| 9' <sup>c</sup>                     | CTGCTT <u>CATATG</u> TCTTCCGATCCATCTAAGATTG            |
| 10                                  | ACCGTAC <u>CATATG</u> AAACTGAAAAGTATAACTATCAGTCCTTCC   |
| 11                                  | ATAC <u>CATATG</u> ACGTTAGATTCCATTA AAATCAATCCAGT      |
| 11' <sub>Pom</sub> <sup>d</sup>     | GATCGAC <u>CATATG</u> ACTGCGACTTACAATTCCATC            |
| P-12 <sup>b</sup>                   | ACCCTTTCTTCGATTTCAATATCTCCTATCAA                       |
| <i>Reverse primers</i> <sup>e</sup> |                                                        |
| 8                                   | TAAAAT <u>CTCGAG</u> TGCAGGAGTGACATTCAAAC              |
| 9                                   | TTTAAT <u>CTCGAG</u> TAAGTCAGTGACTGTAATCGGAATTG        |
| 10                                  | ATTTTACT <u>CTCGAG</u> GGCAGCACTTACATTA AAATTTATTTTA   |
| P-10 <sup>b</sup>                   | GGCAGCACTTACATTA AAATTTATTTTATTACTGCTTATAG             |
| 11                                  | ATATTT <u>CTCGAG</u> TGCTGCGCTGACCGTTATG               |
| 11' <sup>f</sup>                    | CTGTTACT <u>CTCGAG</u> ACTGGACCAGGTA ACTGAATC          |
| 12                                  | ATTTAACT <u>CTCGAG</u> AGCTATCGTGTCCGTTTTGTTTAC        |
| CTD <sub>Pom</sub> <sup>g</sup>     | CTATTT <u>CTCGAG</u> TTAATTGGA ACTATTAATTATTTTGTAATTGG |

<sup>a</sup>Forward primers are named for the respective LigB repeats as in **Table 1** and displayed 5' to 3' with leaders containing an *Nde* I restriction endonuclease site that is underlined. See **Table 1** for the initial amino acid of each LigB repeat from *L. interrogans* serovar Copenhageni strain Fiocruz L1-130.

<sup>b</sup>5'-phosphorylated for blunt-end ligation to 3'-end of linker-encoding sequence following repeat 10.

<sup>c</sup>N-terminal-deleted repeat 9 starting at S803.

<sup>d</sup>N-terminal-deleted repeat 11 from *L. interrogans* serovar Pomona starting at T1014.

<sup>e</sup>Reverse primers contain an *Xho* I site that is underlined. See **Table 1** for the last residue of the linker sequence that follows each repeat except for repeat 12.

<sup>f</sup>C-terminal-deleted repeat 11 ending at S985.

<sup>g</sup>First 45 amino acids of the C-terminal domain in the Pomona strain ending at N1165.
